# Supplementary material for: Novel bis-acac-O,O–Ir(iii) catalyst for anti-Markovnikov, hydroarylation of olefins operates by arene CH activation
Source: Royal Society of Chemistry journal article supplement (doi:10.1039/b208680h), 2002-01-01
Supplement: b208680h.doc [file b208680h.doc]

# Novel bis-Acac-O,O-Ir(III) Catalyst for AntiMarkovnikov, Hydro-Arylation of Unactivated Olefins Operates by CH Activation: Are Ir(V) intermediates Involved?

Roy A. Periana*, Gaurav Bhalla, Xiang Y. Liu.

# University of Southern California, Chemistry Department, Loker Hydrocarbon Institute, Los Angeles, CA 90089.

# Supporting Information

**1. General:**

GC analysis was performed with ashimadzu GC-MS QP5000 (ver. 2) equipped with cross-linked methyl silicone gum capillary column, DB5. The retention times of the products were confirmed by comparison to standards. NMR spectra were obtained on a Bruker AM-360 spectrometer, measured at 360.138 MHz for 1H and 90.566 MHz for 13C or on a Bruker AC-250 spectrometer, measured at 250.134 MHz for 1H and 62.902 MHz for 13C. Chemical shifts are given in ppm. Elemental analyses were done by Desert Analytics laboratory, Arizona. Synthetic work was carried out under air. Reagent-grade chemicals and solvents were used as purchased from Aldrich or Strem chemicals. Complex **1** was prepared as described in the literature1.

**Synthesis of Ir(*O*,*O*-acac)2(*C*-acac)(H2O)(2-H2O)**. In a round-bottom flask equipped with a reflux condenser vented to an oil bubble, 1 g of IrCl3(H2O)x (54.11% of Ir, 2.82 mmol), 10 ml of 2,5-pentadione (9.75 mmol) and 1 g of NaHCO3(11.9 mmol) were added. The mixture was heated to gentle reflux with stirring for 48h. During this time, a yellow solid precipitated. The reaction mixture was cooled to room temperature and the solid was collected as crude product. The yellow solid was dissolved in 200 ml H2O at room temperature under vigorous stirring and was filtered. Solution was concentrated under vacuo to give 650 mg (45%) complex **2-H2O** as yellow microcrystalline. 1HNMR (D2O):  5.53(s, 2H, CH), 5.47(s, 1H, CH), 1.90(s, 12H, CH3), 1.73(s, 6H, CH3). 13C{1H} NMR (D2O/10%CD3OD):  217.9(s, *C*-acac, C=O), 188.0(s, *O*-acac, C=O), 104.5(s, *O*-acac, CH), 50.0(s, *C*-acac, CH), 33.2(s, *C*-acac, CH3, 28.3(s, *O*-acac, CH3). Anal. Calcd: C, 35.50; H, 4.57. Found: C, 35.20; H, 4.39.

**Synthesis of Ir(*O*,*O*-acac)2(*C*-acac)(Py)(2-Pyr)**. To a mixture containing 100 mg (0.197 mmol) of **2-H2O** in 10 ml of CHCl3, 1 ml (12.3 mmol) of Pyridine was added. The mixture was heated at 60oC for 1 minute to generate a homogenous solution and was filtered. Solvent was removed in vacuo to give quantitative yield of Complex **2-py** (112mg, 100%). 1HNMR and 13C{1H} NMR (CDCl3) were consistent with that were reported (1). Anal. Calcd: C, 42.24; H, 4.61; N, 2.46. Found: C, 41.95; H, 4.65; N, 2.74.

**Synthesis of Ir(*O*,*O*-acac)2(Ph)(H2O)(3-H2O)**. 100mg (0.197 mmol) of **2-Pyr** was added to a 6ml mixture of CH3OH and H2O (2:1) followed by 71 mg (0.2 mmol) of HgPh2 in 10ml of acetone. The mixture was stirred for 5 minutes. Complex **3-H2O** formed immediately as yellow crystalline in 70% yield (67 mg). 1HNMR (THF-d8):  6.65(m, 3H, Ph), 6.57(m, 2H, Ph), 5.21(s, 2H, CH), 1.77(s, 12H, CH3), 13C{1H} NMR (THF-d8):  184.5(s, *O*-acac, C=O), 136.3(s, Ph), 125.3(s, Ph), 122.9(s, Ph), 103.0(s, *O*-acac, CH), 26.6(s, *O*-acac, CH3). Anal. Calcd: C, 39.58; H, 4.36. Found: C, 39.88; H, 4.44.

1. Bennett, M. A.; Mitchell, T. R. B. *Inorg*. *Chem*. **1976**, *15*, 2936.

**Synthesis of Ir(*O*,*O*-acac)2(Ph)(Py)(3-Pyr)**. To a mixture containing 100 mg (0.206 mmol) of **3-H2O** in 10 ml of CHCl3 1 ml (12.3 mmol) of Pyridine was added. The mixture was heated at 60oC for 1 minute to generate a homogenous solution and was filtered. Solvent was removed in vacuo to give quantitative yield of complex **3-py** (107mg, 100%). Crystals for X-ray diffraction were grown in concentrated CHCl3 solution at 0oC. 1HNMR (CDCl3):  8.52(m, 2H, Py), 7.81(m, 1H, Py), 7.46(m, 2H, Py), 6.99(m, 5H, Ph), 5.14(s, 2H, CH), 1.80(s, 12H, CH3), 13C{1H} NMR (CDCl3):  184.5(s, *O*-acac, C=O), 149.7(s, Py), 135.7(s, Py), 125.2(s, Py), 137.3(s, Ph), 131.3(s, Ph) 124.5(s, Ph), 122.9(s, Ph), 103.3(s, *O*-acac, CH), 27.1(s, *O*-acac, CH3). Anal. Calcd: C, 46.14; H, 4.43; N, 2.56. Found: C, 45.84; H, 4.36; N, 2.45.

**Reaction Procedure for the Olefin Arylation:** A 20 ml stainless steel autoclave, equipped with a glass insert and a magnetic stir bar was charged with 3 ml of dry, distilled benzene and 1-3 mg of catalyst (unless otherwise mentioned). The reactor was degassed with nitrogen, pressurized with 0.96 MPa of propylene and an additional 2.96 MPa of nitrogen. It was heated to 180 oC for 30 minutes. The liquid phase was sampled and the product yields were determined by GC-MS using methyl cyclohexane as an internal standard that was introduced into the reaction solution after the reaction.

**Insertion Reation of Propylene into the Ir(-*O*,*O*-acac)2(Ph)(Py)(3-Pyr):** A 20 ml stainless steel autoclave, equipped with a glass insert and a magnetic stir bar was charged with distilled 1 ml of mesitylene and 15mg of Phenyl-Iridium compound, **3-pyr**. The reactor was degassed with nitrogen, pressurized with 0.96MPa of propylene and an additional 2.96 MPa of nitrogen. It was heated to 180 oC for 10 minutes. The liquid phase was sampled and the product yields were determined by GC-MS using methyl cyclohexane as an internal standard that was introduced into the reaction solution after the reaction.
